# Supplementary material
Source: Springer Nature journal article supplement (https://www.springermedizin.de/resource/supplementary/13223_2010_151_MOESM1_ESM.pdf/9597236)
Supplement: MOESM1 [file 9597236]

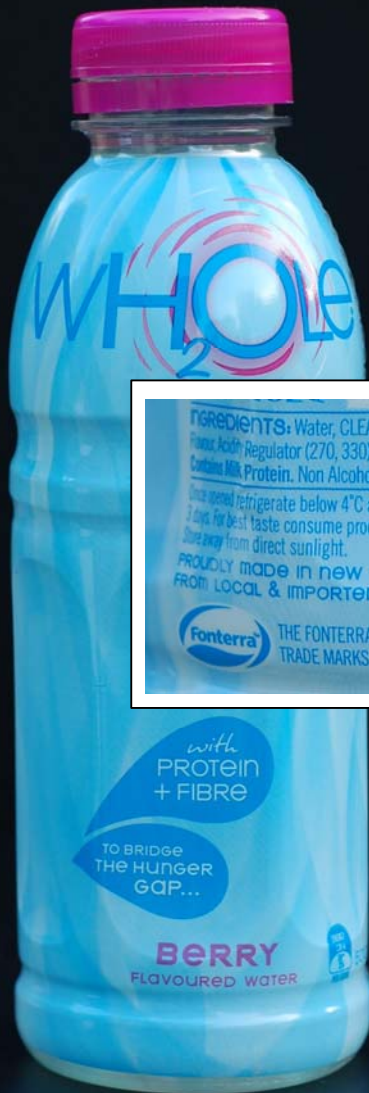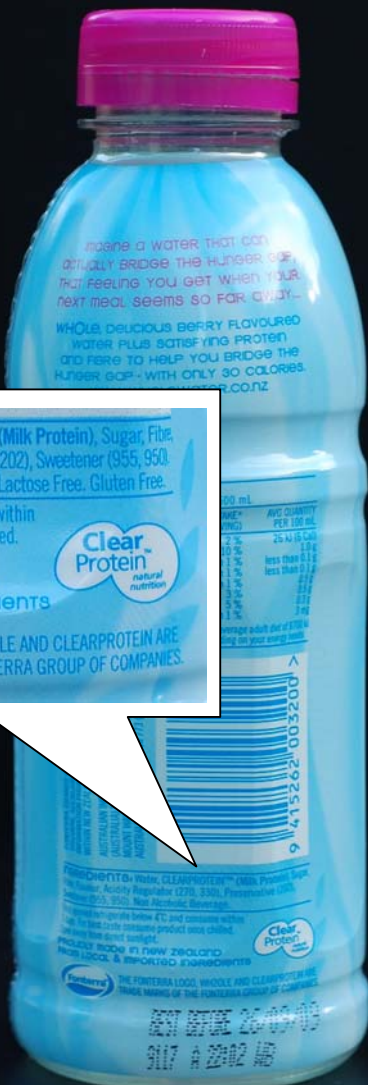

Imagine a water that can  
ACTUALLY BRIDGE THE HUNGER GAP,  
that feeling you get when your  
next meal seems so far away...

WHOLE delicious BERRY flavoured  
water plus satisfying protein  
and fibre to help you bridge the  
HUNGER GAP - WITH ONLY 30 CALORIES.  
www.whole2.co.nz

**INGREDIENTS:** Water, CLEARPROTEIN™ (Milk Protein), Sugar, Fibre, Phosphoric Acid, Acidity Regulator (270, 330), Preservative (202), Sweetener (955, 950), Contains Milk Protein. Non Alcoholic Beverage. Lactose Free. Gluten Free.

Once opened refrigerate below 4°C and consume within  
3 days. For best taste consume product once chilled.  
Store away from direct sunlight.

PROUDLY MADE IN NEW ZEALAND  
FROM LOCAL & IMPORTED INGREDIENTS

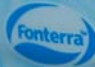

THE FONTERRA LOGO, WHOLE2 AND CLEARPROTEIN ARE  
TRADE MARKS OF THE FONTERRA GROUP OF COMPANIES.

Clear  
Protein  
natural  
nutrition

200 ml

ENERG

PER 100 ml

25.4 kJ (6.0 kcal)

1.0 g

less than 0.1 g

less than 0.1 g

Average adult per 200 ml  
Serving size 200 ml

Energy 25.4 kJ (6.0 kcal)

Protein 1.0 g

Total Fat less than 0.1 g

Saturated Fat less than 0.1 g

Trans Fat 0.1 g

Carbohydrate 0.1 g

Sugars 0.1 g

Fibre 0.1 g

Other 0.1 g

INGREDIENTS: Water, CLEARPROTEIN™ (Milk Protein), Sugar, Fibre, Phosphoric Acid, Acidity Regulator (270, 330), Preservative (202), Sweetener (955, 950), Contains Milk Protein. Non Alcoholic Beverage. Lactose Free. Gluten Free.

Once opened refrigerate below 4°C and consume within  
3 days. For best taste consume product once chilled.  
Store away from direct sunlight.

PROUDLY MADE IN NEW ZEALAND  
FROM LOCAL & IMPORTED INGREDIENTS

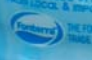

THE FONTERRA LOGO, WHOLE2 AND CLEARPROTEIN ARE  
TRADE MARKS OF THE FONTERRA GROUP OF COMPANIES.

Clear  
Protein  
natural  
nutrition

BEST BEFORE 26-09-09  
3117 A 23-02 MB
